# Supplementary material for: Inhibition of cardiomyocyte apoptosis post-acute myocardial infarction through the efficient delivery of microRNA-24 by silica nanoparticles
Source: Royal Society of Chemistry journal article supplement (doi:10.1039/d1na00568e), 2021-01-01
Supplement: d1na00568e1.zip [file d1na00568e1.zip]

## Sheet: Sheet1
0h
H2O2	98.8	97.8	99.1	99.4	99.8	99.5
Control	100	100	100	102	99.4	100
6h
H2O2	86.3	86.3	86.3	86.8	85.2	87.4
Control	96.2	96.2	97.6	99.5	99.5	109
12h
H2O2	69.2	70.5	71.8	72.8	75.4	76.7
Control	100	99	99.7	100	97.1	102
24h
H2O2	53.1	57.1	54.6	57.1	59.1	58.6
Control	97.7	104	103	98.9	95.4	101
24h
H2O2	40	38.4	40.4	47.4	43.2	45.9
Control	100	102	97.9	101	97.9	95
